# Supplementary material
Source: PubMed Central journal article supplement (PMC3485721)
Supplement: AEM.01960-12_zam999103791so2.pdf [file AEM.01960-12_zam999103791so2.pdf]

**TABLE S1.** Described species of ammonia-oxidizing archaea (AOA) and ammonia monooxygenase-encoding archaea (AEA) as of July 2012. Note that additional strains of “*Ca. N. koreensis*”, “*Ca. N. limnia*”, “*Ca. N. maritimus*” and “*Ca. Nitrososphaera* sp.” have been reported in the literature (36, 61, 89, 99, 144; see also Fig. S1), but they fall below the species cut-off of 99% identity on the 16S rRNA level that was used to establish this table. Ammonia-oxidizing activities of “*Ca. C. symbiosum*” and “*Ca. N. salaria*” have yet not been demonstrated in the literature and should be referred to as AEA until shown otherwise. All AEA/AOA except *N. maritimus* SMC1 and *N. viennensis* EN76 are still in *Candidatus*-status. Labeling as such in the list is omitted for sake of brevity.

| Organism                                                          | <i>Cenarchaeum symbiosum</i> A    | <i>Nitrosoarchaeum koreensis</i> MY1  | <i>Nitrosoarchaeum limnia</i> SFB1   | <i>Nitrosocaldus yellowstonii</i> | <i>Nitrosopumilus maritimus</i> SCM1 | <i>Nitrosopumilus salaria</i> BD31 | <i>Nitrososphaera gargensis</i> | <i>Nitrososphaera viennensis</i> EN76   | <i>Nitrosotalea devanaterrea</i> | ‘AOA-AC5’                | ‘AOA-DW’               |
|-------------------------------------------------------------------|-----------------------------------|---------------------------------------|--------------------------------------|-----------------------------------|--------------------------------------|------------------------------------|---------------------------------|-----------------------------------------|----------------------------------|--------------------------|------------------------|
| <b>Affiliation</b>                                                | group I.1a                        | group I.1a                            | group I.1a                           | ThAOA group                       | group I.1a                           | group I.1a                         | group I.1b                      | group I.1b                              | group I.1a-associated            | group I.1a               | group I.1a             |
| <b>Availability</b>                                               |                                   | enrichment                            | enrichment                           | enrichment                        | pure culture                         | enrichment                         | enrichment                      | pure culture                            | enrichment                       | enrichment               | enrichment             |
| <b>Original habitat</b>                                           | marine sponge <i>Axinella</i> sp. | rhizosphere of <i>Caragana sinica</i> | low-salinity sediment                | hot spring sediment               | tropical marine aquarium water       | estuary sediment                   | thermal spring microbial mat    | garden soil                             | acidic soil                      | freshwater sediment      | freshwater sediment    |
| <b>T<sub>opt</sub> [°C]</b>                                       | 10                                | 25                                    | 22 <sup>b</sup>                      | 72                                | 28                                   |                                    | 46                              | 35                                      | 25                               | 27                       | 27                     |
| <b>pH<sub>opt</sub></b>                                           |                                   | 6.0 - 8.0                             | 7.0 - 7.2 <sup>b</sup>               | ~8.0                              | 7.0 - 7.2                            |                                    | 7.0 - 7.4                       | 7.5                                     | 4.5                              | 7.0 - 7.5                | 7.0 - 7.5              |
| <b>Inhibitory [NH<sub>4</sub><sup>+</sup>] / [NH<sub>3</sub>]</b> |                                   | 20 mM / 145 μM (pH 7.0)               |                                      |                                   | 2-3 mM / 18-27 μM (pH 7.0)           |                                    | <3.08 mM / <88 μM (pH 7.0)      | 10-15 mM / 0.51-0.75 mM                 | <50 mM / <9 μM                   | >5 mM / >130 μM (pH 7.5) | 1 mM / >26 μM (pH 7.5) |
| <b>Growth rate [day<sup>-1</sup>]</b>                             |                                   |                                       | 0.2 (low) / 0.12 (high) <sup>c</sup> | 0.8                               | 0.65 (30 °C)                         |                                    |                                 | 0.043 (auto) / 0.53 (mixo) <sup>e</sup> | 0.37                             | 0.55                     | 0.55                   |
| <b>Yield [cells μM<sup>-1</sup> NH<sub>3</sub>]</b>               |                                   | 1.1 * 10 <sup>5</sup>                 |                                      |                                   | 4 * 10 <sup>5</sup>                  |                                    |                                 |                                         | 4.5 * 10 <sup>5</sup>            |                          |                        |
| <b>Cell shape</b>                                                 | rod                               | rod                                   | rod                                  | spherical                         | rod                                  |                                    | spherical                       | spherical                               | rod                              |                          |                        |
| <b>Diameter / length [μm]</b>                                     | 0.5 / 0.8                         | 0.3 - 0.5 / 0.6 - 1.0                 | 0.19 - 0.27 / 0.55 - 1.00            | ~0.5 <sup>d</sup>                 | 0.17 - 0.22 / 0.5 - 0.9              |                                    | 0.9 ± 0.3                       | 0.5 - 0.8                               | 0.33 ± 0.01 / 0.89 ± 0.05        |                          |                        |
| <b>Genome size [Mb]</b>                                           | 2.05                              | >1.61 <sup>a</sup>                    | >1.77 <sup>a</sup>                   | 1.43 <sup>d</sup>                 | 1.65                                 | >1.57 <sup>a</sup>                 | 2.83                            |                                         |                                  |                          |                        |
| <b>References</b>                                                 | 44, 45, 107                       | 58, 60                                | 15, 90                               | 29                                | 65, 79                               | 88                                 | 46                              | 131                                     | 71                               | 36                       | 36                     |

<sup>a</sup>unclosed draft genome; <sup>b</sup> *in situ* measurements at the sampling site; <sup>c</sup> growth rates for low (25% of seawater) and high (75% of seawater) salinity media; <sup>d</sup> de la Torre, pers. comm.; <sup>e</sup> growth rate under autotrophic (auto) and mixotroph (mixo) conditions (*i.e.* pyruvate)
