# Supplementary material
Source: PubMed Central journal article supplement (PMC3485721)
Supplement: AEM.01960-12_zam999103791so3.pdf [file AEM.01960-12_zam999103791so3.pdf]

**TABLE S2.** A recommended, recently published (32, 103, 130) primer set for the amplification of archaeal *amoA*-like gene sequences. Together, these primers target the full diversity of *amoA*-like sequences in public databases.

| Primer name       | Sequence 5'-3'             | Annealing Temp. | Amplicon length      | Specificity                                                                           | References |
|-------------------|----------------------------|-----------------|----------------------|---------------------------------------------------------------------------------------|------------|
| <b>CamoA-19f</b>  | ATG GTC TGG YTW AGA CG     | 50 °C           | ~629 bp              | most <i>amoA</i> -like sequences affiliated to groups I.1a, I.1a-associated and I.1b  | 103, 130   |
| <b>CamoA-616r</b> | GCC ATC CAB CKR TAN GTC CA |                 |                      |                                                                                       |            |
| <b>DegAamoA-F</b> | ATH AAY GCN GGN GAY TA     | ~57-58 °C       | ~450 bp <sup>a</sup> | <i>amoA</i> -like sequences of “ <i>Ca. N. yellowstonii</i> ”-related archaea (ThAOA) | 32         |
| <b>DegAamoA-R</b> | ACY TGN GGY TCD ATN GG     |                 |                      |                                                                                       |            |

<sup>a</sup> expect additional non-specific bands (Dodsworth, pers. comm.)
